# Supplementary material for: Multilineage contribution of CD34+ cells in cardiac remodeling after ischemia/reperfusion injury
Source: Springer Nature journal article supplement (doi:10.1007/s00395-023-00981-8), 2023-05-05
Supplement: MOESM7 [file 25323158]

## Supplementary Figures

### Multilineage Contribution of CD34<sup>+</sup> Cells in Cardiac Remodeling after Ischemia/Reperfusion Injury

**Running title:** CD34<sup>+</sup> Cells in Myocardial I/R Injury

Jun Xie <sup>1†</sup>, LiuJun Jiang <sup>2†</sup>, Junzhuo Wang <sup>1†</sup>, Yong Yin <sup>1</sup>, Ruilin Wang <sup>2</sup>, Ting Chen <sup>2,3</sup>, Zhichao Ni <sup>2</sup>, Shuaihua Qiao <sup>1</sup>, Hui Gong <sup>2</sup>, Biao Xu <sup>1\*</sup>, Qingbo Xu <sup>2\*</sup>

<sup>1</sup>Department of Cardiology, Drum Tower Hospital, State Key Laboratory of Pharmaceutical Biotechnology, Medical School of Nanjing University, Nanjing, China;

<sup>2</sup>Department of Cardiology, the First Affiliated Hospital, Zhejiang University School of Medicine, Hangzhou, China;

<sup>3</sup>Alibaba-Zhejiang University Joint Research Center of Future Digital Healthcare, Hangzhou, China.

\*Corresponding author. Biao Xu, MD, PhD, Department of Cardiology, Drum Tower Hospital, State Key Laboratory of Pharmaceutical Biotechnology, Medical School of Nanjing University, No. 321 Zhongshan Road, Nanjing, 210008, Jiangsu, China. Phone and Fax: +86 25-68182812, E-mail: xubiao62@nju.edu.cn. And Qingbo Xu, MD, PhD, Department of Cardiology, the First Affiliated Hospital, Zhejiang University School of Medicine, 79 Qingchun Road, Hangzhou, Zhejiang Province, P.R.China, 310003. Tel: +86 571-87236500, Fax: +86 571 4008306430, Email: qingbo\_xu@zju.edu.cn.

† These authors contributed equally to this work.

**Fig. S1**

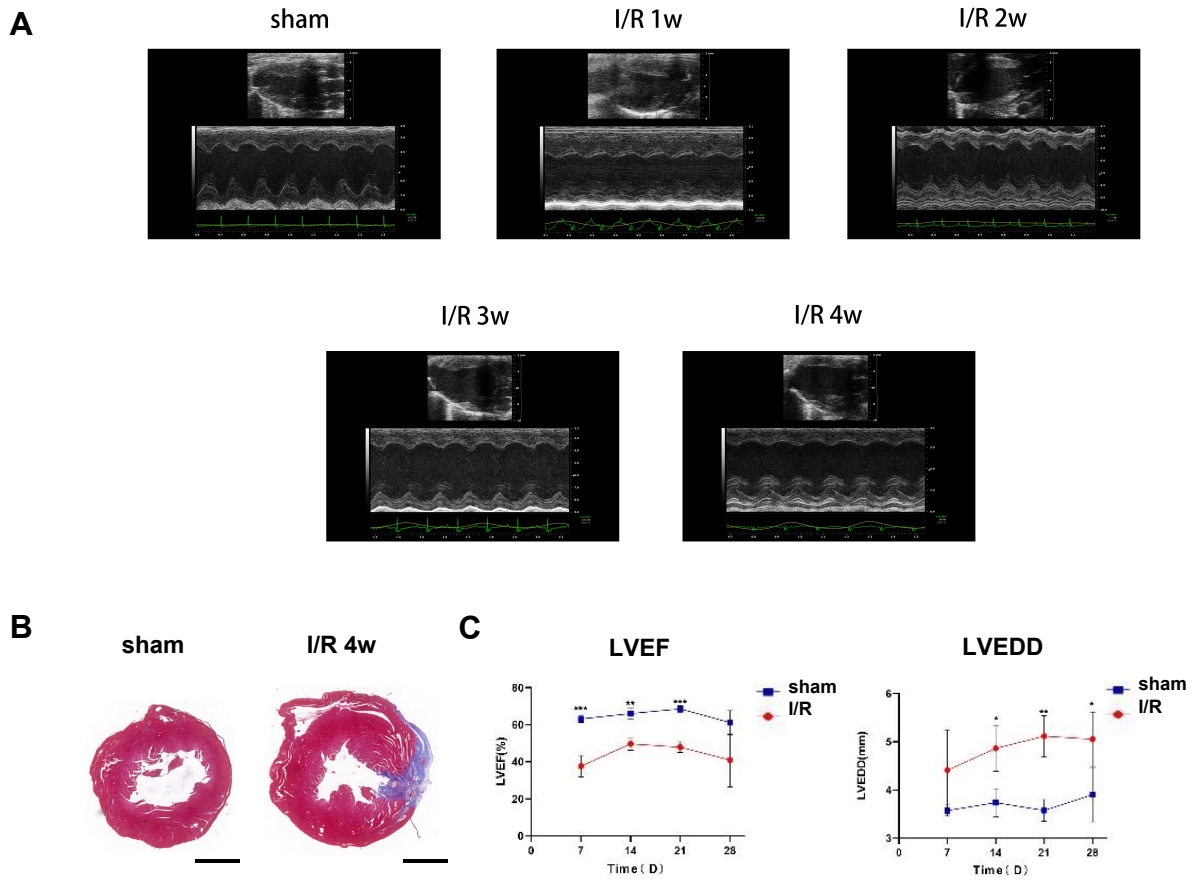

**Figure S1. Establishment of ischemia/ reperfusion (I/R) injury model in mouse. (A)** Representative echocardiogram of injured mice at different time points. **(B)** Masson staining of hearts sectioned at 28 days post-I/R. Scale bar, 1mm. **(C)** Line charts showing echocardiographic measurements of left ventricle ejection fraction (LVEF) and left ventricle end diastolic diameter (LVEDD) in mice from sham or different I/R groups. n=4 mice in I/R groups and n=3 in sham group. Data was shown as mean  $\pm$  SEM, \*p<0.05, \*\*p<0.01, \*\*\*p<0.001, by one-way ANOVA test.

**Fig. S2**

**A**

| PARAMETER                  | I/R sham    | I/R 1w      | I/R 2w      | I/R sham tdT <sup>+</sup> | I/R 1w tdT <sup>+</sup> | I/R 2w tdT <sup>+</sup> | human control | human diseased |
|----------------------------|-------------|-------------|-------------|---------------------------|-------------------------|-------------------------|---------------|----------------|
| Estimated Number of Cells  | 4,138       | 6,020       | 6,259       | 5,661                     | 6,919                   | 6,567                   | 16,635        | 10,148         |
| Number of Reads            | 343,924,898 | 366,396,555 | 385,098,741 | 382,151,246               | 314,269,145             | 371,390,747             | 1,109,082,737 | 659,401,504    |
| Fraction Reads in Cells    | 57.40%      | 81.80%      | 81.60%      | 87.60%                    | 85.30%                  | 88.90%                  | 87.40%        | 83.30%         |
| Mean Reads per Cell        | 83,114      | 60,863      | 61,527      | 67,506                    | 45,421                  | 56,554                  | 66,672        | 64,978         |
| Median UMI Counts per Cell | 4,836       | 7,564       | 5,873       | 9,096                     | 7,113                   | 10,262                  | 6,012         | 4,820          |
| Total Genes Detected       | 19,861      | 21,665      | 20,826      | 20,151                    | 21,110                  | 20,772                  | 27,937        | 26,306         |
| Median Genes per Cell      | 1,584       | 2,516       | 2,188       | 2,907                     | 2,444                   | 3,189                   | 2,113         | 1,598          |

**B**

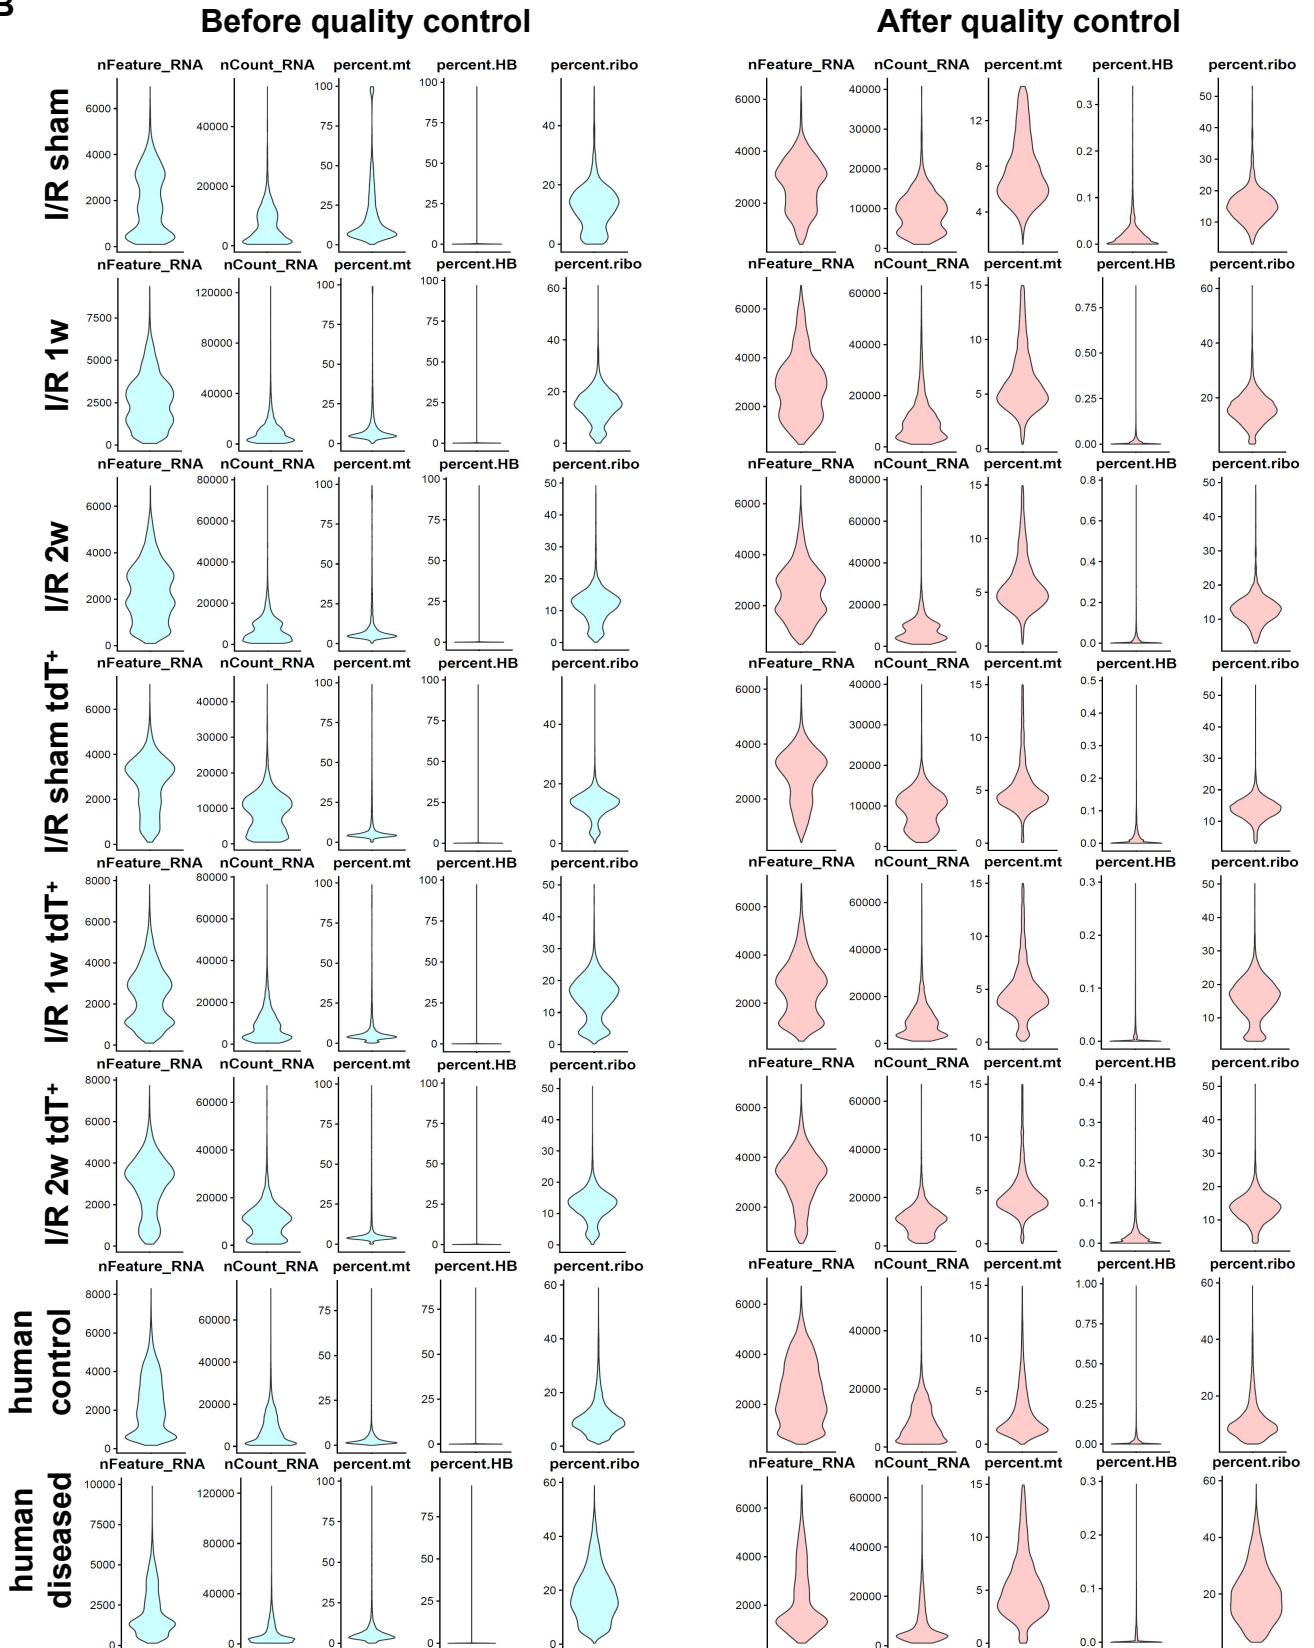

**Figure S2. Quality control of single-cell RNA sequencing.** **(A)** Basic quality control metrics of indicated datasets. **(B)** Distribution violin plot for the number of total genes (nFeature\_RNA), UMIs (nCount\_RNA), percent of mitochondrial genes (percent.mt), hemoglobin genes (percent.HB) and ribosome genes (percent.ribo) detected from each dataset before and after filtering. Cells expressing 400~7000 genes, >1000 UMIs, <1% hemoglobin genes, >3% ribosome genes and <15% mitochondrial genes were filtered for further analyses.



**Fig. S3**

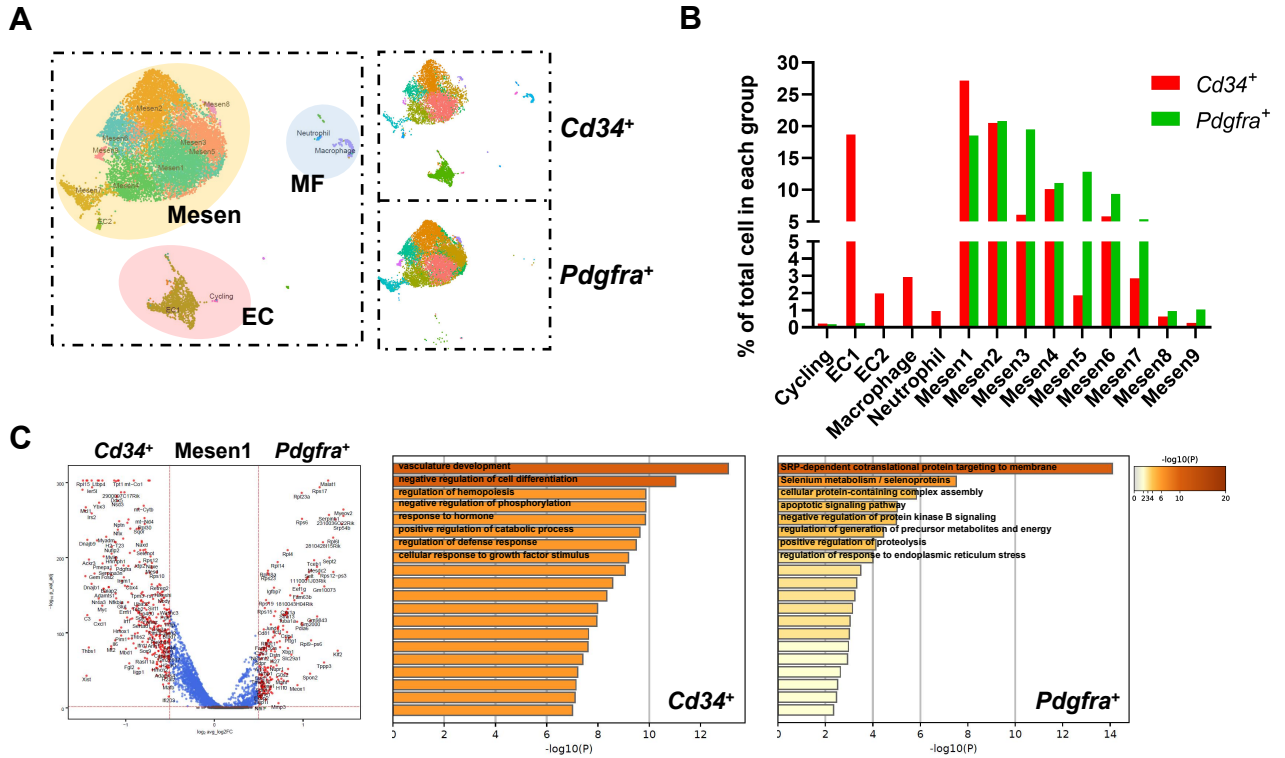

**Figure S3. *Cd34*-lineage cells exhibited preserved property of promoting angiogenesis in I/R injury.** (A) UMAP plot displaying 14 color-coded cell clusters (3 major cell types) in integrated data by merging sham *Cd34*-lineage cell dataset (*Cd34*<sup>+</sup>) and a public dataset of GFP<sup>+</sup> cells from the sham group of *Pdgfra*<sup>eGFP</sup> mice (*Pdgfra*<sup>+</sup>) [7], with corresponding cell clusters at different datasets, n=14,064 cells. (B) Bar chart showing the proportion of each cell clusters between *Cd34*<sup>+</sup> and *Pdgfra*<sup>+</sup> cells. (C) Volcano plots showing differentially expressed genes (DEGs) of cells from Mesen1 between *Cd34*<sup>+</sup> and *Pdgfra*<sup>+</sup> cells, with corresponding pathway enrichment analyses using significant DEGs showing enriched biological processes. MF, macrophage. EC, endothelial cell. Mesen, mesenchymal cell. tdT, tdTomato.

Fig. S4

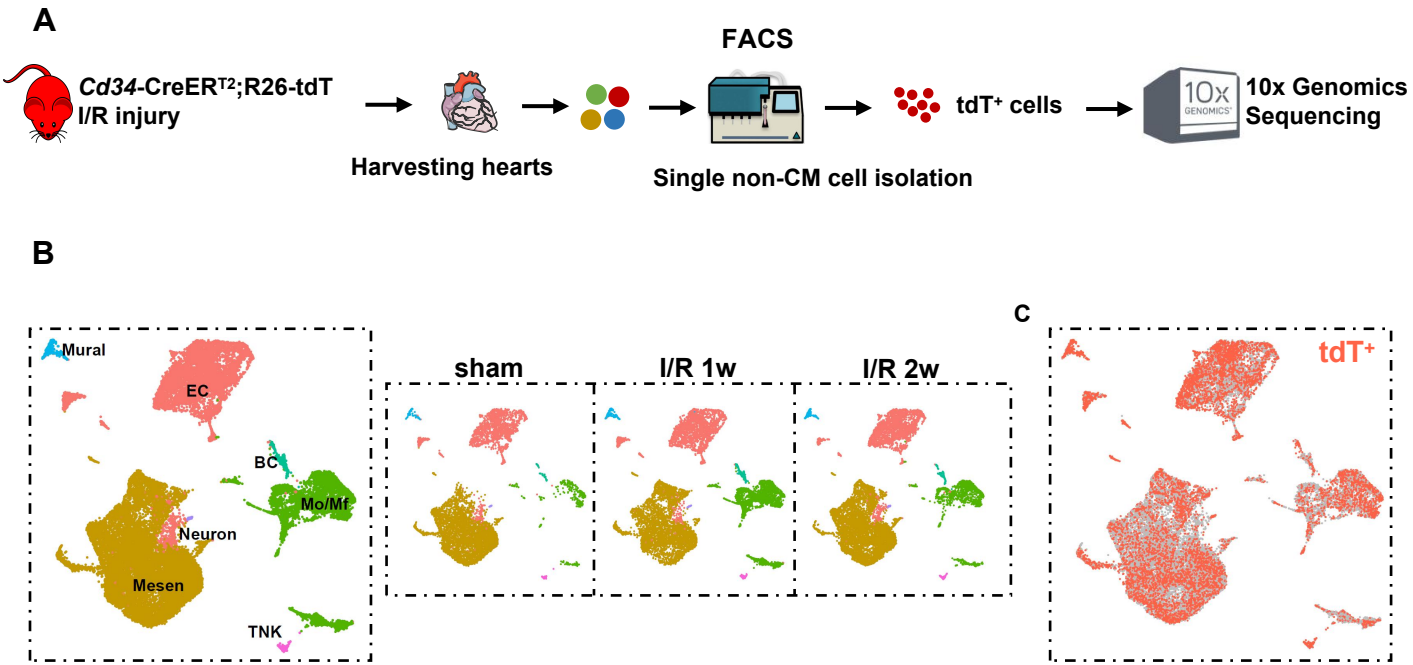

**Figure S4. Study of *Cd34*-lineage cells in I/R injury using lineage tracing models at single-cell level.** (A) Schematic depicting heart tissue harvested from *Cd34-CreER<sup>T2</sup>;R26-tdT* (Cre/TDT) mice for scRNA-seq. I/R injury and sham operations were performed and heart tissue was harvested at indicated time points. Single cells were then isolated from the left ventricle, sorted as tdT<sup>+</sup> cells according to the expression of lineage marker tdT by fluorescence-activated cell sorting (FACS) and subjected for scRNA-seq (n=3 mice per group). (B) The integrated scRNA-seq dataset visualized by UMAP plot displaying the 7 color-coded major cell types from total-cell and tdT-labeled-*Cd34*-lineage-cell datasets from sham, 1- and 2-week post-I/R heart tissue, n=26,320 cells. Cell clustering at different time points was shown on the right. (C) Feature plot showing the distribution of tdT<sup>+</sup> cells across all cell clusters. BC, B cell. TNK, T and natural killer (NK) cells. Mo/Mf, monocyte/macrophage. EC, endothelial cell. Mesen, mesenchymal cell. tdT, tdTomato.

**Fig. S5**

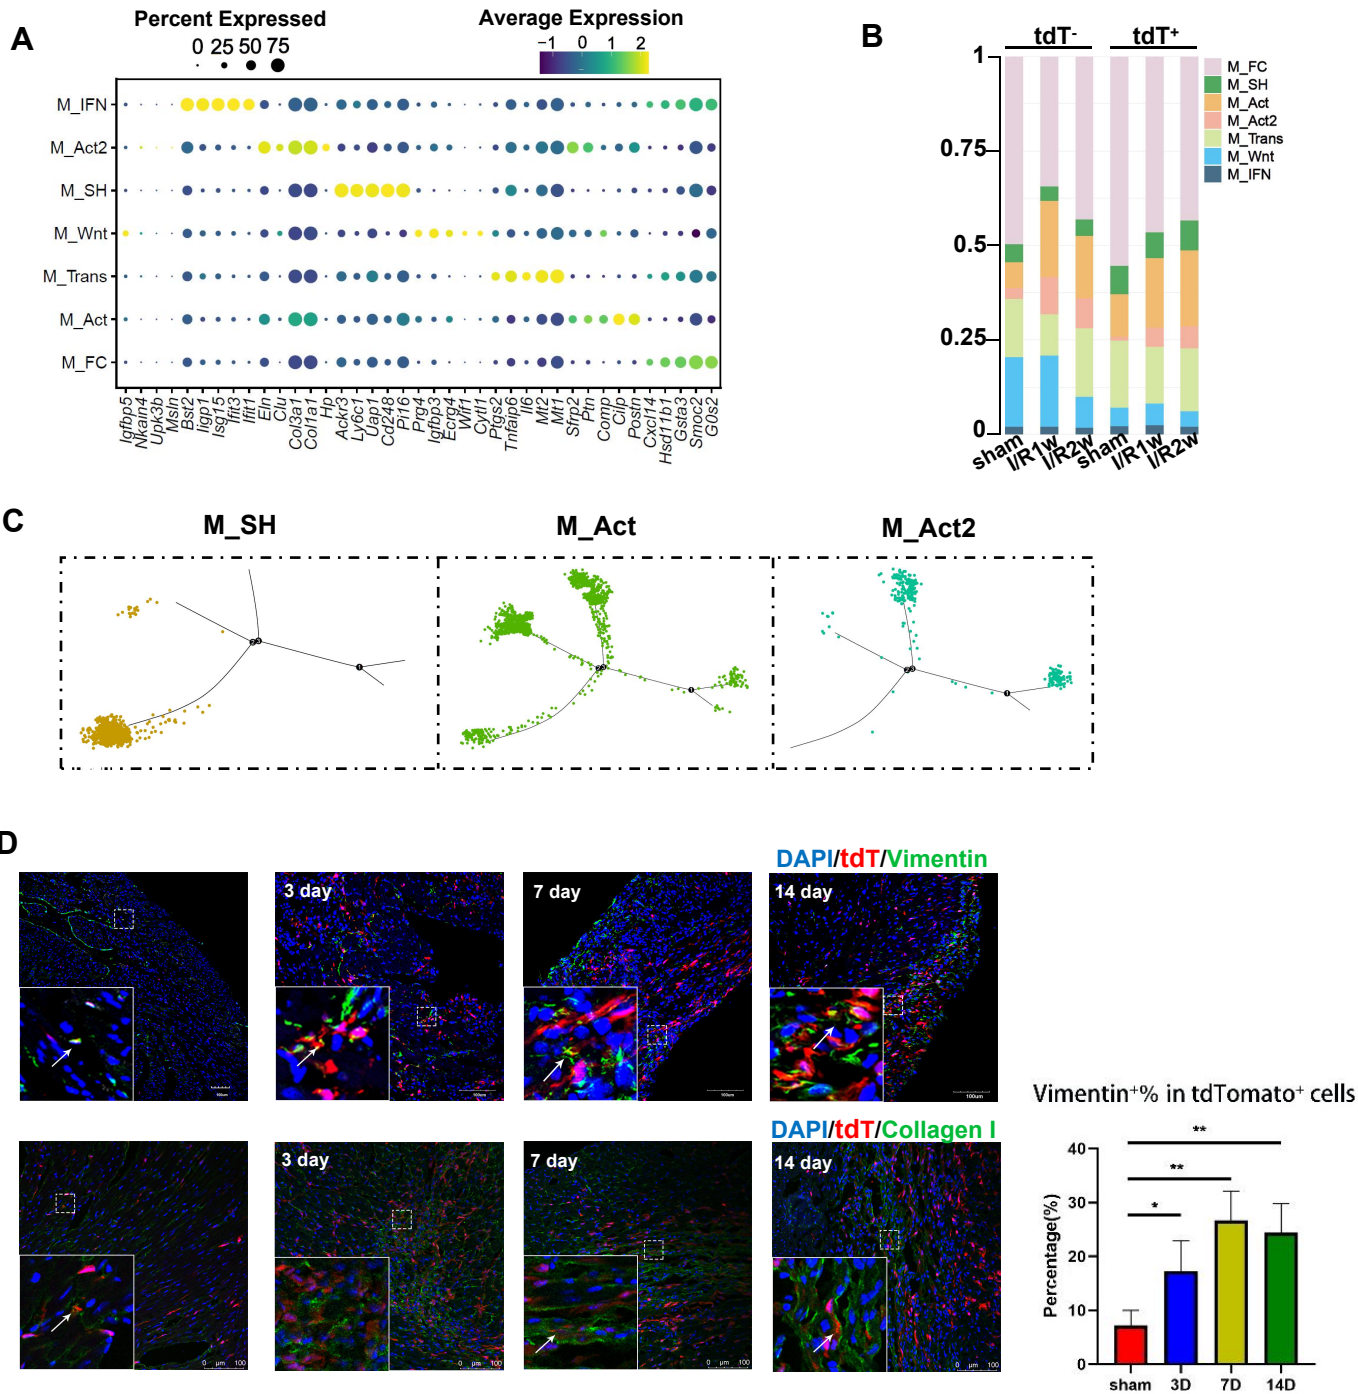

**Figure S5. Contribution of *Cd34*-lineage mesenchymal cells in I/R injury.** (A) Dot plot displaying average scaled expression levels of top 5 DEGs across identified mesenchymal cell sub-clusters. (B) Bar charts showing the proportion of mesenchymal sub-clusters among different time points. (C) Monocle trajectory analyses over pseudotime showing cell distribution of M\_SH, M\_Act and M\_Act2 sub-clusters separately. (D) Representative cross-sections of Cre/TdT ventricles stained with tdT and Vimentin/ Collagen I in border zones at the indicated time point, with magnification of the boxed region, arrows indicated co-staining cells. Quantification of the percentages of Vimentin<sup>+</sup> cells in tdTomato<sup>+</sup> cells at the indicated time points by immunofluorescence was shown on the right panel. N=3 mice in the sham group and N=4 mice in the I/R 3d, 7d, 14d groups, \*p<0.05, \*\*p<0.01, by one-way ANNOVA test. Mesen, mesenchymal cell. IFN, interferon stimulated. Act, activated. SH, Sca-1 high. tdT, tdTomato.

**Fig. S6**

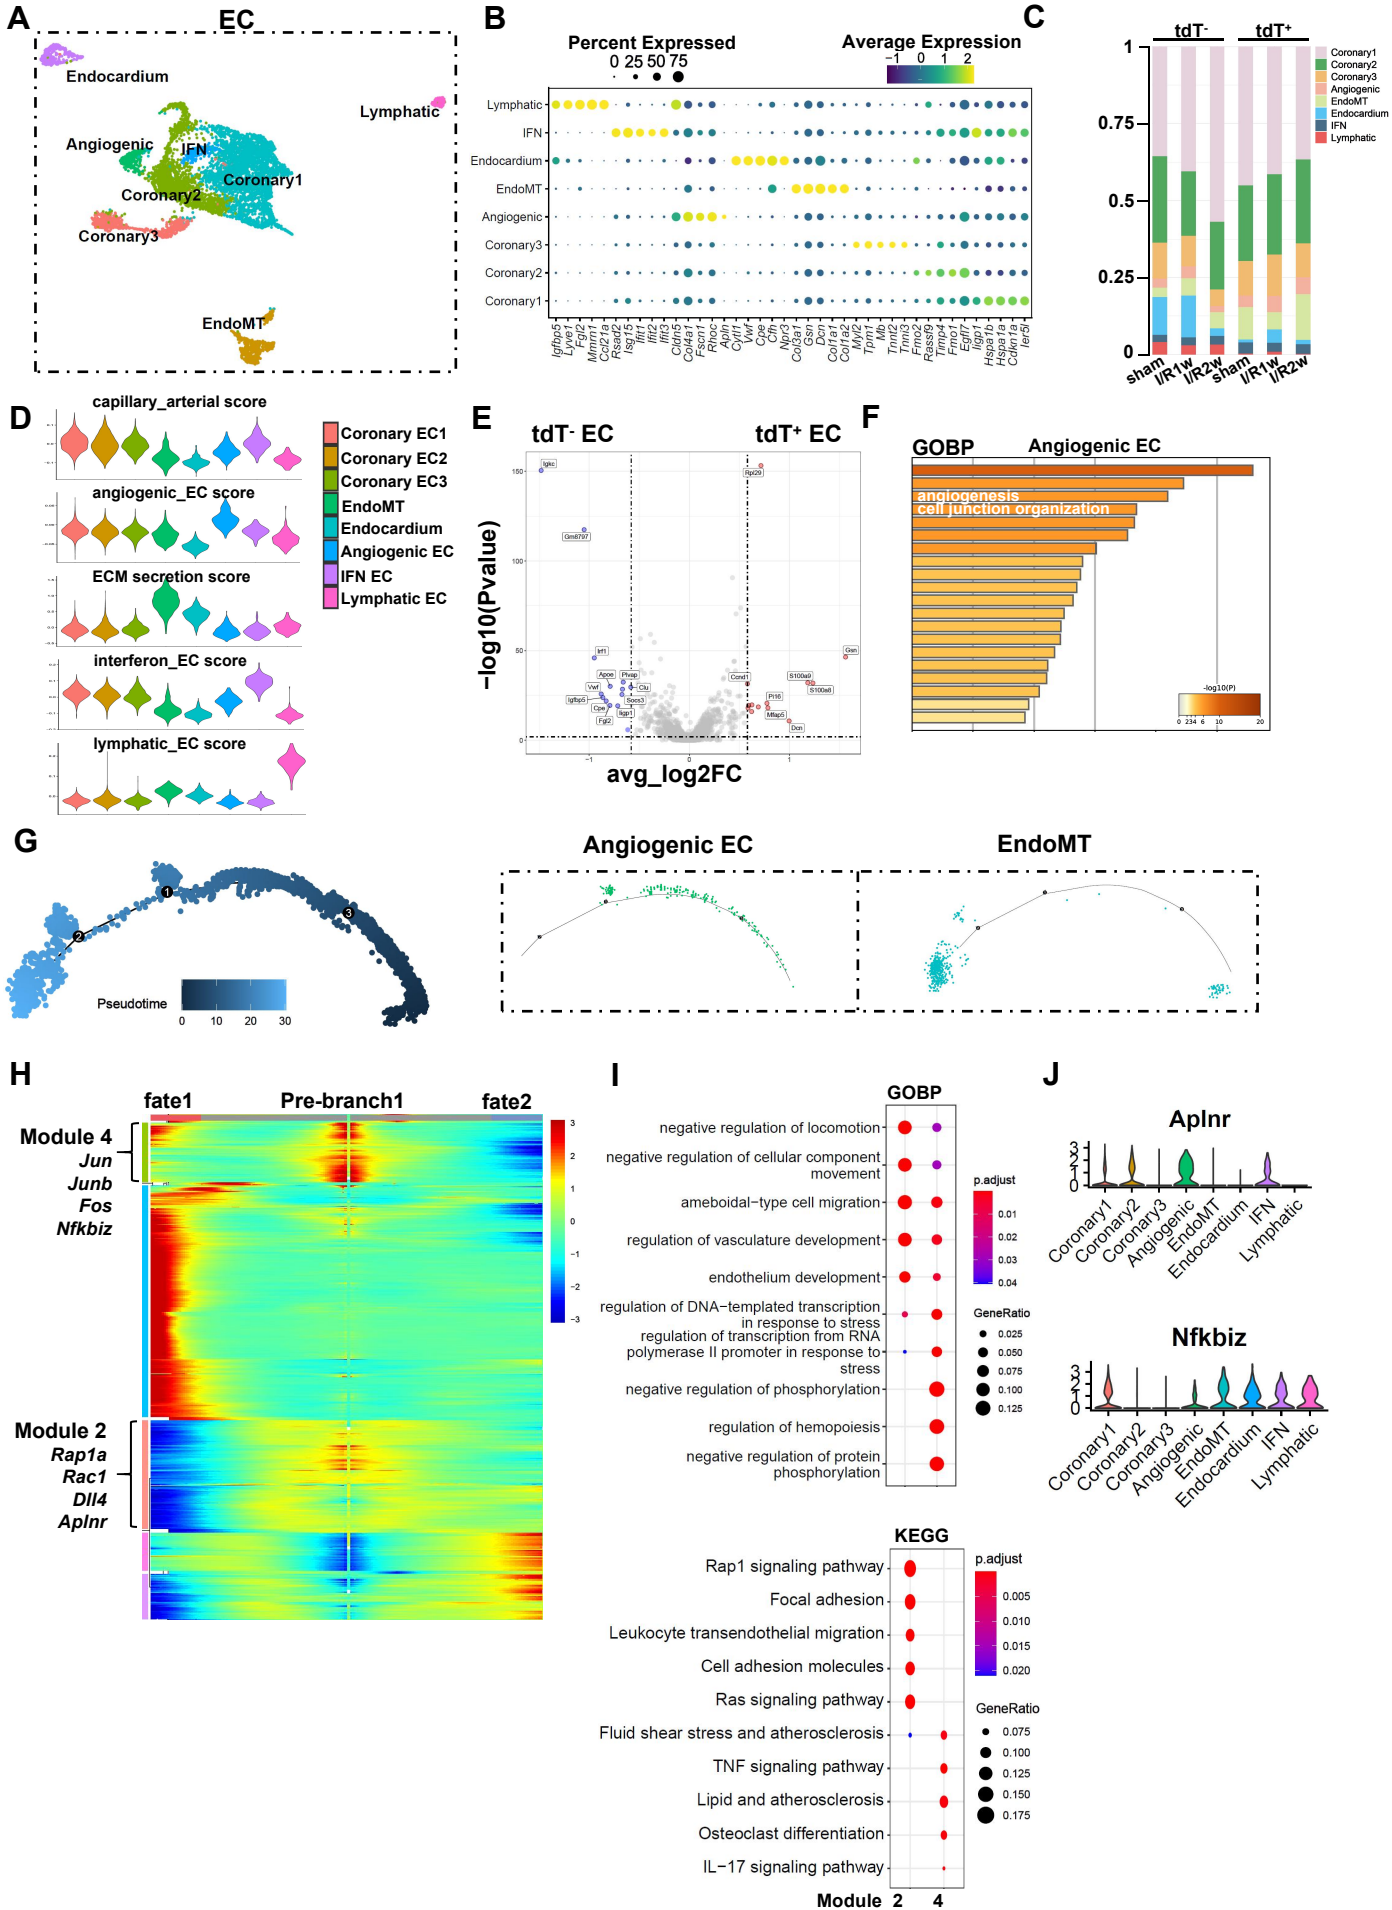

**Figure S6. Contribution of *Cd34*-lineage endothelial cells in I/R injury.** (A) UMAP plot showing 8 color-coded sub-clusters from the endothelial cell (EC) population in I/R injury, n=6,679 cells. (B) Dot plot displaying average scaled expression levels of top 5 DEGs across identified EC sub-clusters. (C) Bar charts showing the proportion of EC sub-clusters among different time points. (D) Violin plots showing expression scores (Z-scores) of capillary-arterial, angiogenic, ECM secretion, interferon stimulated and lymphatic genes across EC sub-clusters. (E) Volcano plot showing DEGs between tdT<sup>+</sup> ECs and tdT<sup>-</sup> ECs. (F) Go enrichment biological process (GOBP) analysis of the angiogenic EC cluster using marker genes to show putative functions. (G) Monocle trajectory analyses of ECs showing cell distribution over pseudotime. Cell distribution of angiogenic EC and EndoMT sub-clusters was separately displayed on the right. (H) Heatmap of the significantly changed genes via BEAM function from monocle in the branch point 1 in Fig. 1o, with representative up-regulated genes listed from 2 pre-branch gene modules (Module 2 and 4). (I) GOBP and Kyoto Encyclopedia of Genes and Genomes (KEGG) analyses of gene Module 2 and 4 indicating distinct biological functions and pathways. (J) Violin plots showing representative genes of Module 2 (*Aplnr*) and 4 (*Nfkbiz*) among EC sub-clusters. EndoMT, endothelial-to-mesenchymal transition. IFN, interferon stimulated. EC, endothelial cell. tdT, tdTomato.



**Fig. S7**

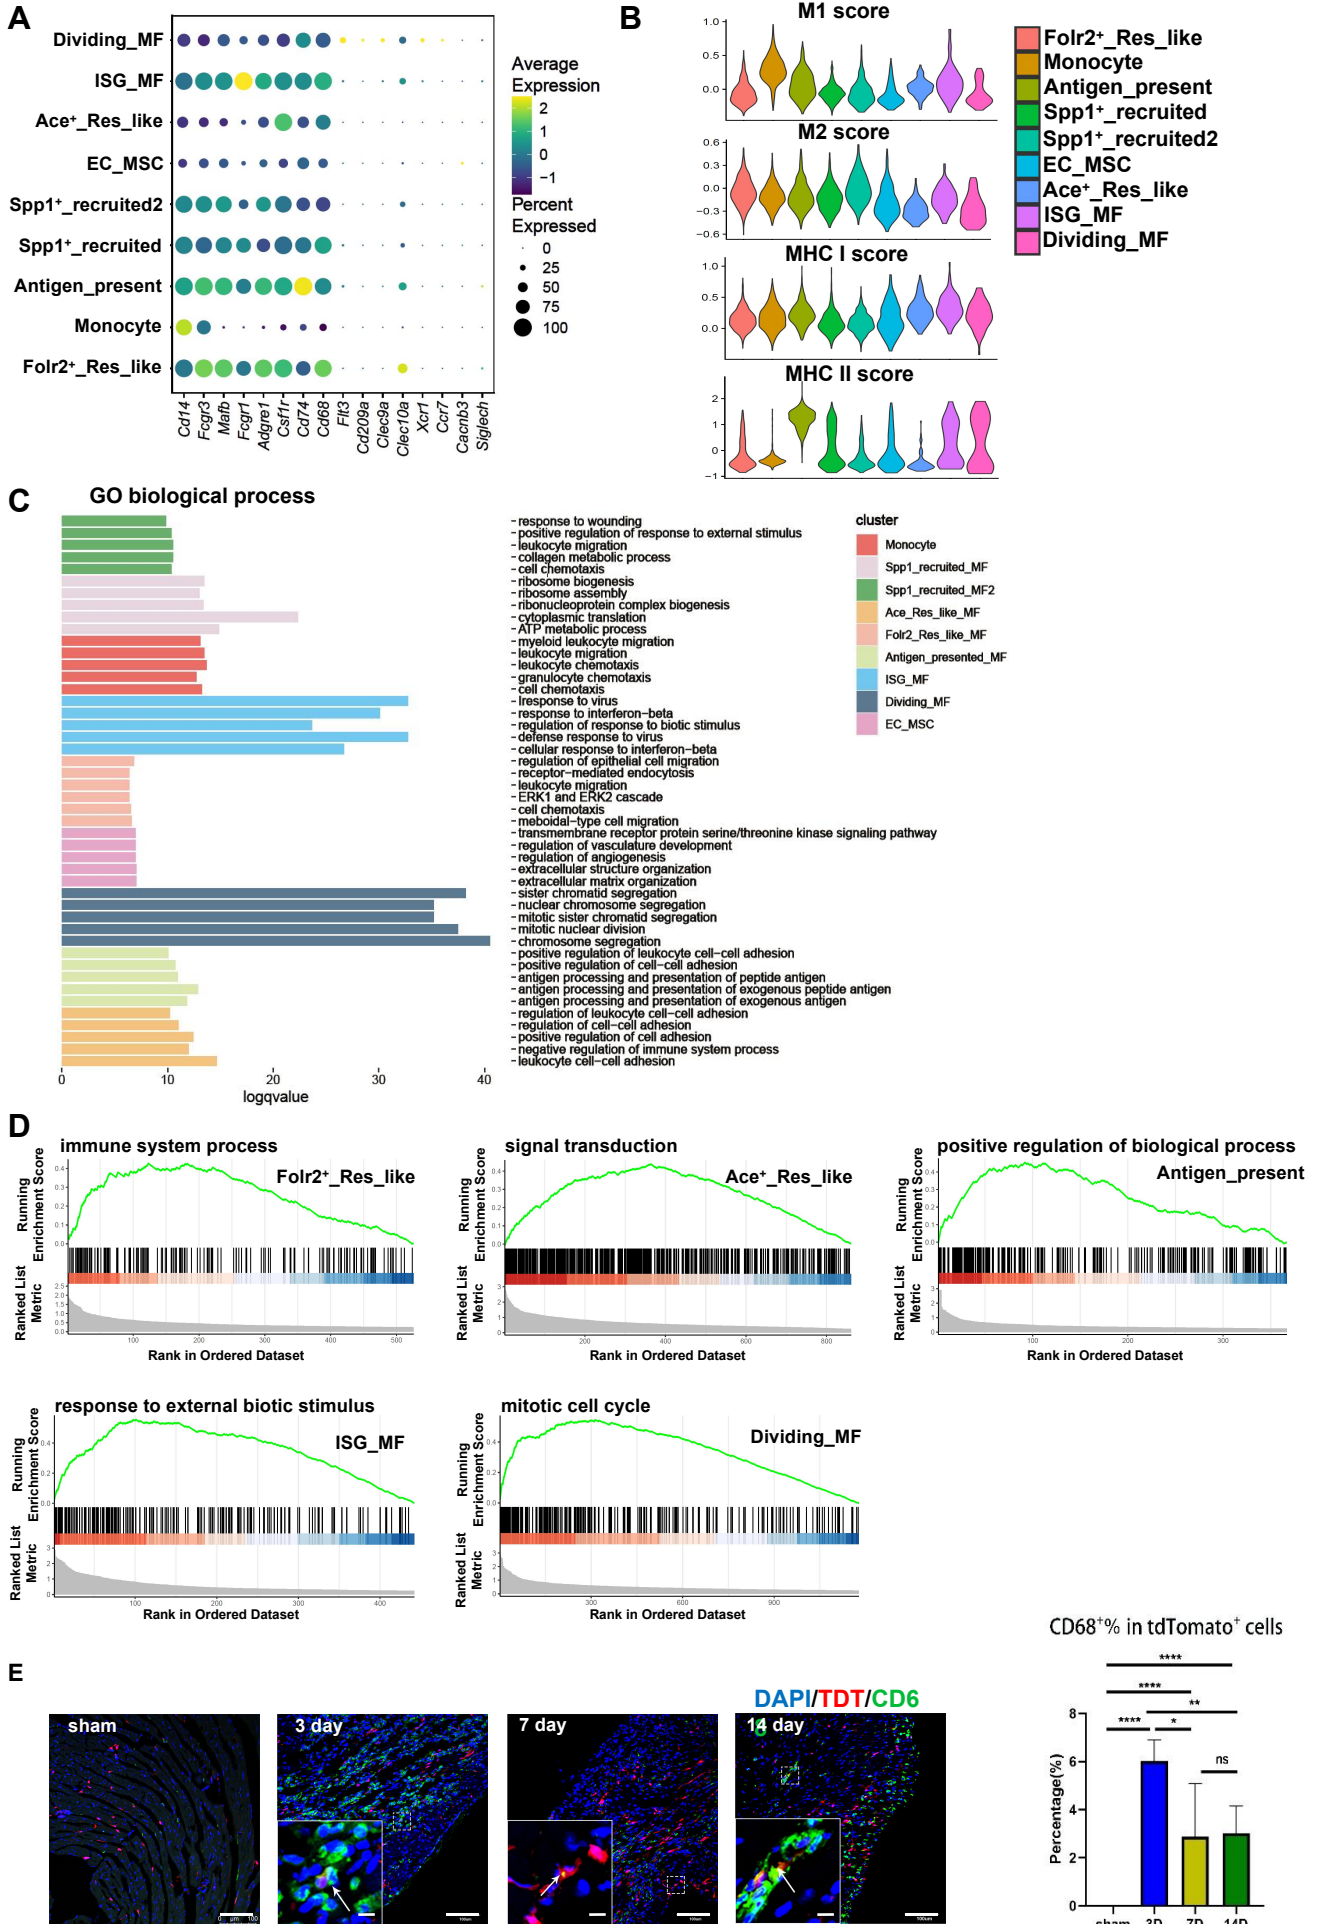

**Figure S7. Contribution of Cd34-lineage endothelial cells in I/R injury.** (A) Dot plot displaying average scaled expression of selected marker genes to define cell sub-clusters including monocyte (*Cd14*), macrophage (*Mafb*, *Fcgr1*, *Adgre1*) and dendritic cells (DCs; *Flt3*, *Cd209a*, *Clec9a*, *Clec10a*, *Xcr1*, *Ccr7*, *Cacnb3*, *Siglech*). Dot size reflects the percentage of cells expressing the selected gene in each cell cluster. (B) violin plots showing expression scores of M1, M2, MHCI and MHC II genes across all sub-clusters. (C) GOBP analyses showing top 5 enriched pathways of each sub-cluster according to their marker genes. (D) GSEA analyses of enriched pathways in each sub-cluster other than recruited macrophages. (E) Representative cross-sections of Cre/TDT ventricles stained with tdTomato and CD68 in border zone at the indicated time point, with magnification of the boxed region. Quantification of the percentages of CD68<sup>+</sup> cells in tdTomato<sup>+</sup> at the indicated time points by immunofluorescence was shown on the right. Scar bar: 100µm and 20 µm in magnification. N=3 mice in sham group and N=4 mice in the I/R groups; \*P<0.05; \*\*P<0.01; \*\*\*\*P<0.0001, by one-way ANNOVA test.

Fig. S8

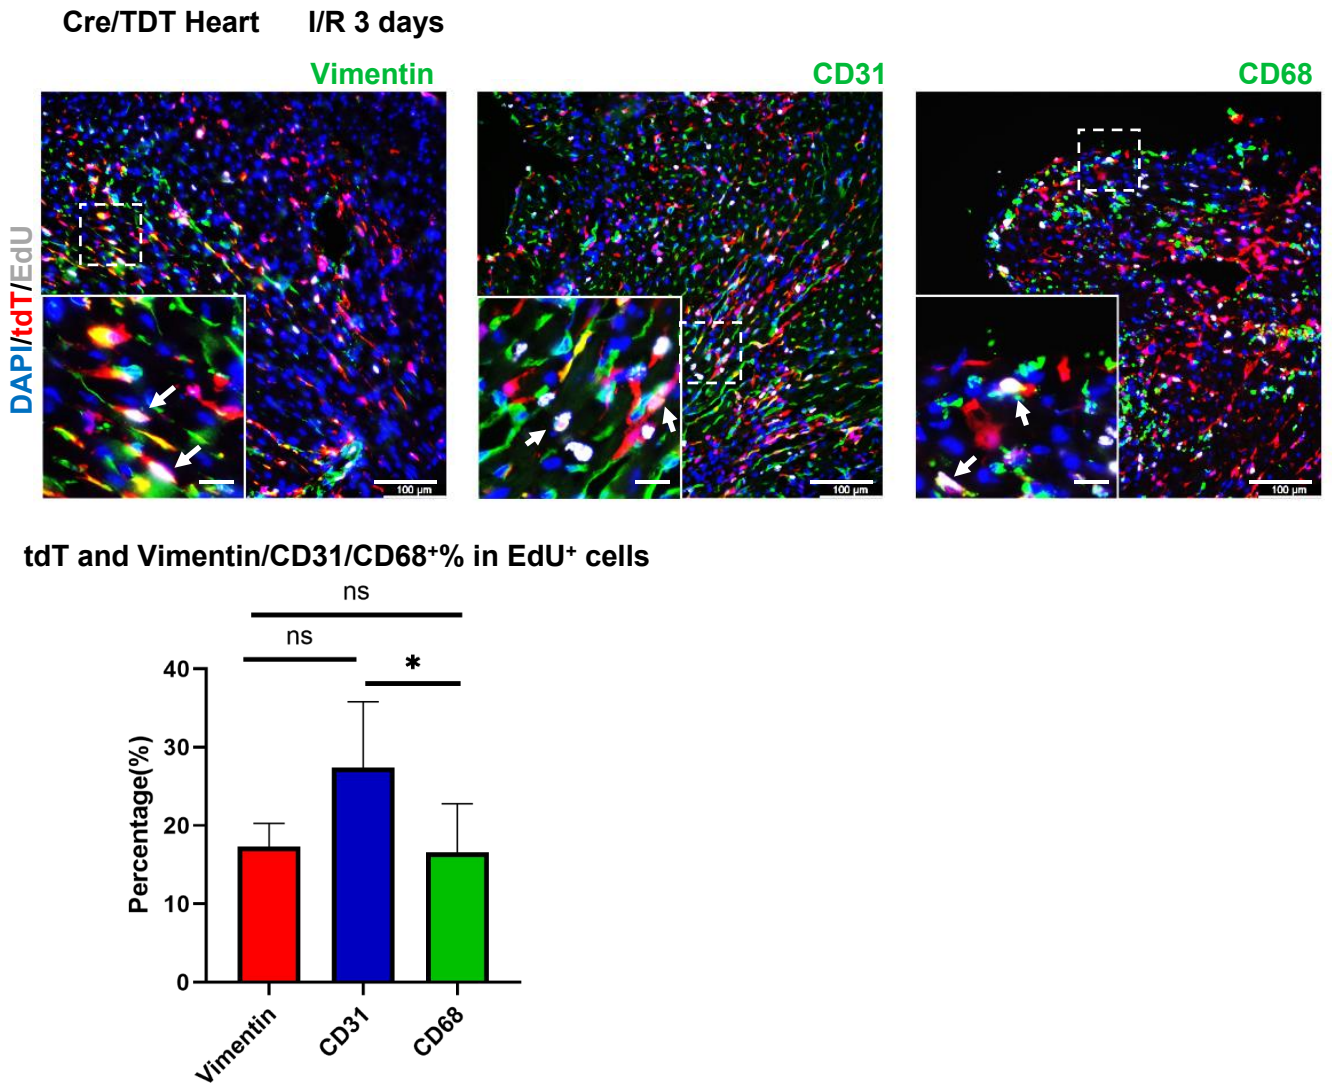

**Figure S8. Proliferating property of *Cd34*-lineage cells in I/R injury.** Representative cross-sections of Cre/TDT ventricles stained with tdT, Vimentin/CD31/CD68 and EdU. Magnification in each image was the magnification of the boxed region, arrows indicated co-staining cells. Quantification of the percentage of proliferating cells was shown below. Scale bars, 100  $\mu$ m, and 20  $\mu$ m in magnification images. tdT, tdTomato.



**Fig. S9**

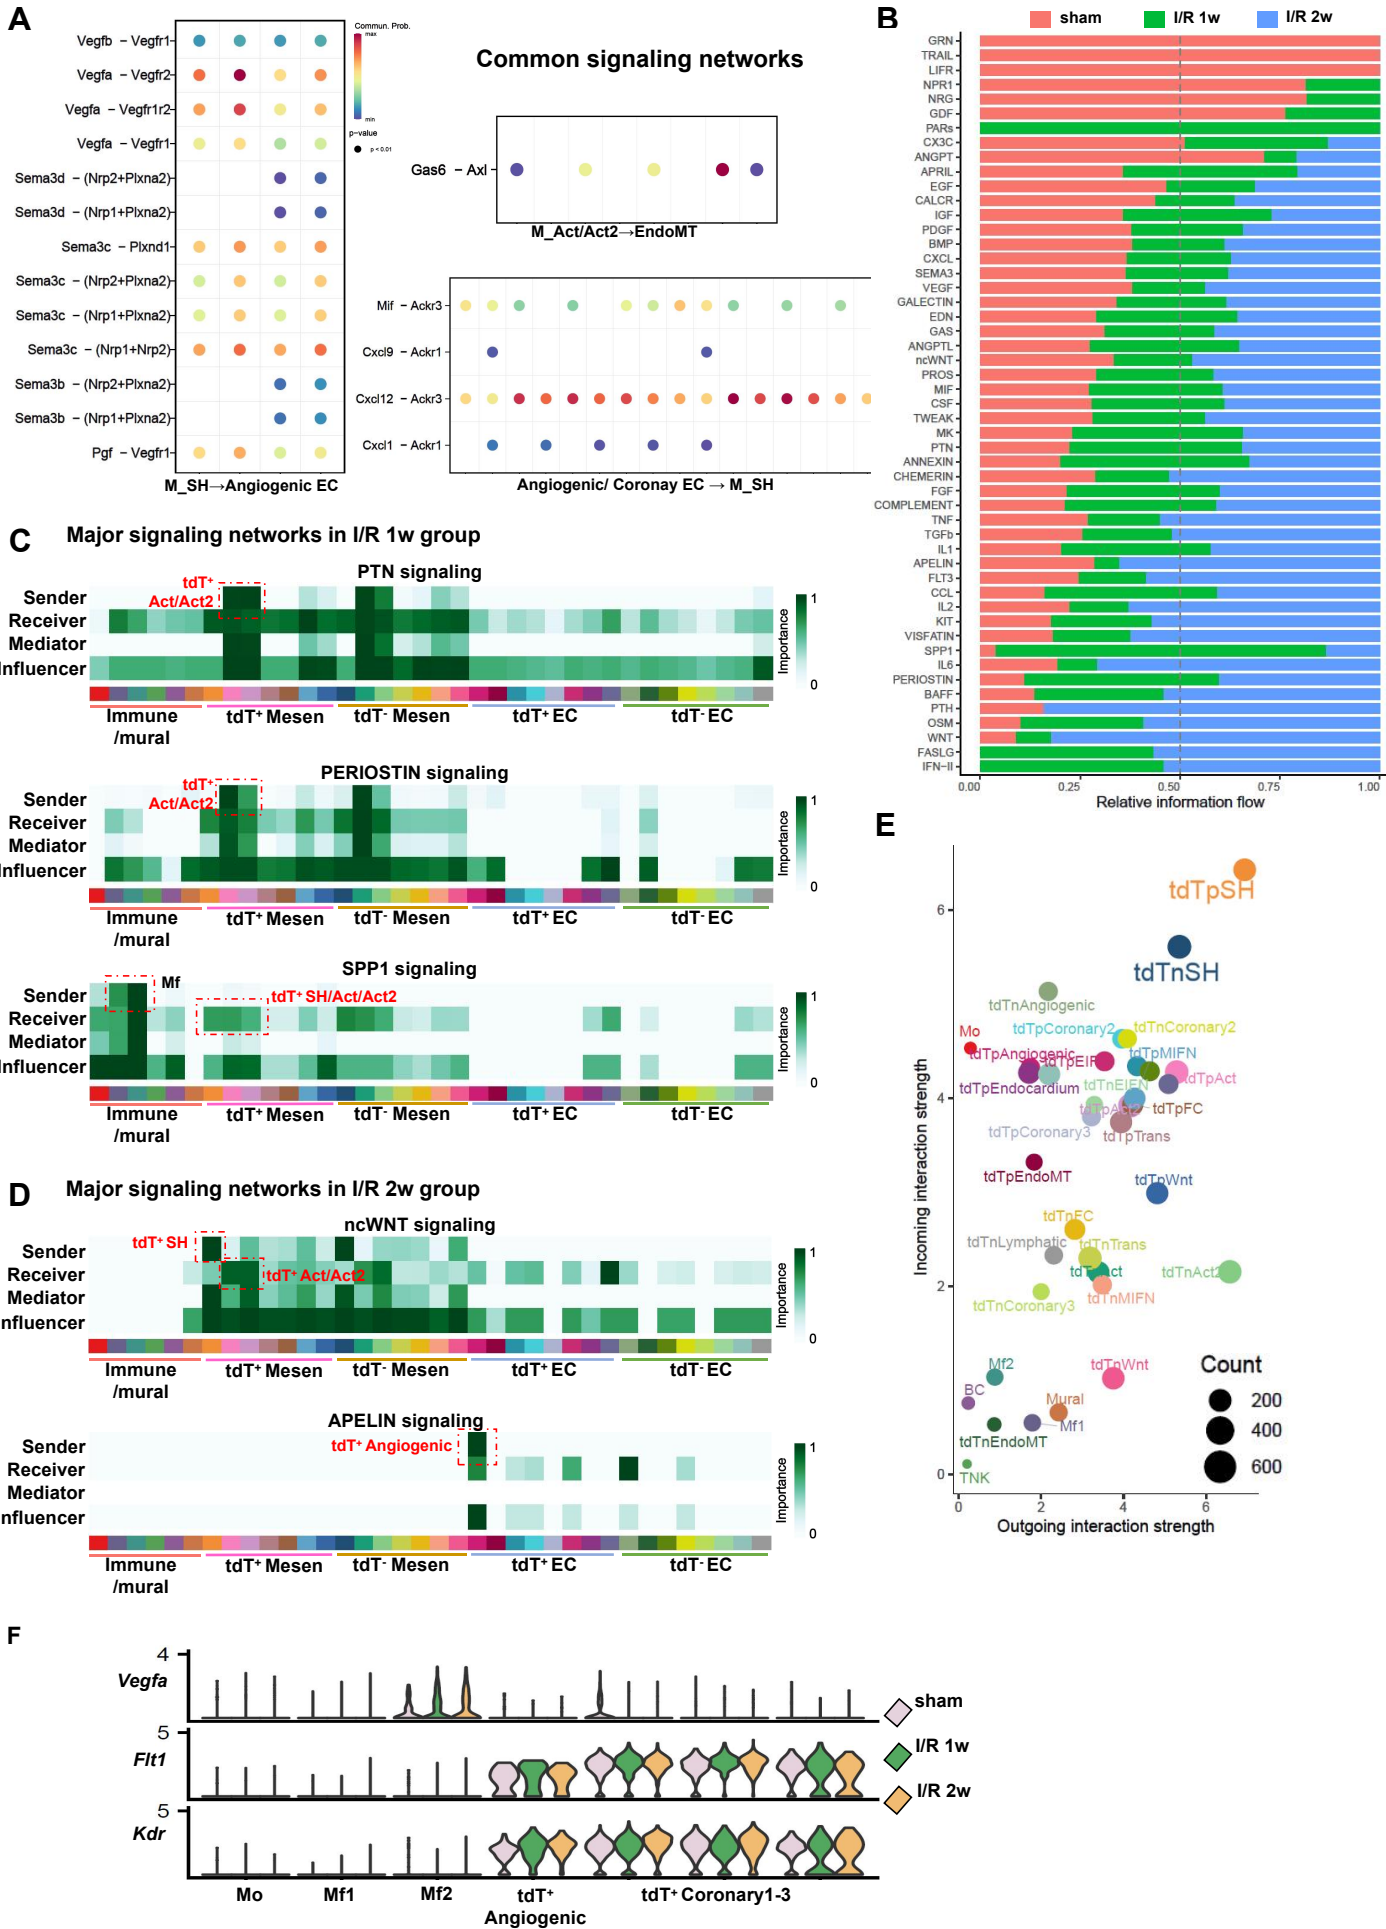

**Figure S9. Intercellular communicating patterns in I/R injury.** (A) Summary dot plots showing common signaling networks between certain mesenchymal and EC sub-clusters via certain ligand-receptor pairs in the whole process of I/R injury. (B) Selected signaling pathway networks that were strongly active in either time point based on the differences of overall information flow as predicted by CellChat. The overall information flow of a signaling network was calculated by summarizing all the communication probabilities in that network. (C) Heatmaps of major signaling networks in the I/R 1w group showing relative importance of each cell group based on the computed four network centrality measures of each signaling network. (D) Heatmaps of major signaling networks in the I/R 2w group showing relative importance of each cell group. (E) Dot plots displaying the overall incoming/ outgoing interaction strength in intercellular communication analyses, indicating the cell-cell communicating activities of each cell cluster. (F) Violin plots displaying expression profile of major VEGF signaling ligand-receptor gene pairs (*Vegfa-Flt1*, *Vegfa-Kdr*) between Mo/Mf clusters and tdT<sup>+</sup> angiogenic/ coronary ECs among different time points after I/R injury. Mo, monocyte. Mf, macrophage. Mesen, mesenchymal cell. EndoMT, endothelial-to-mesenchymal transition. IFN, interferon stimulated. EC, endothelial cell. tdT, tdTomato. tdTp, tdT positive. tdTn, tdT negative.

**Fig. S10**

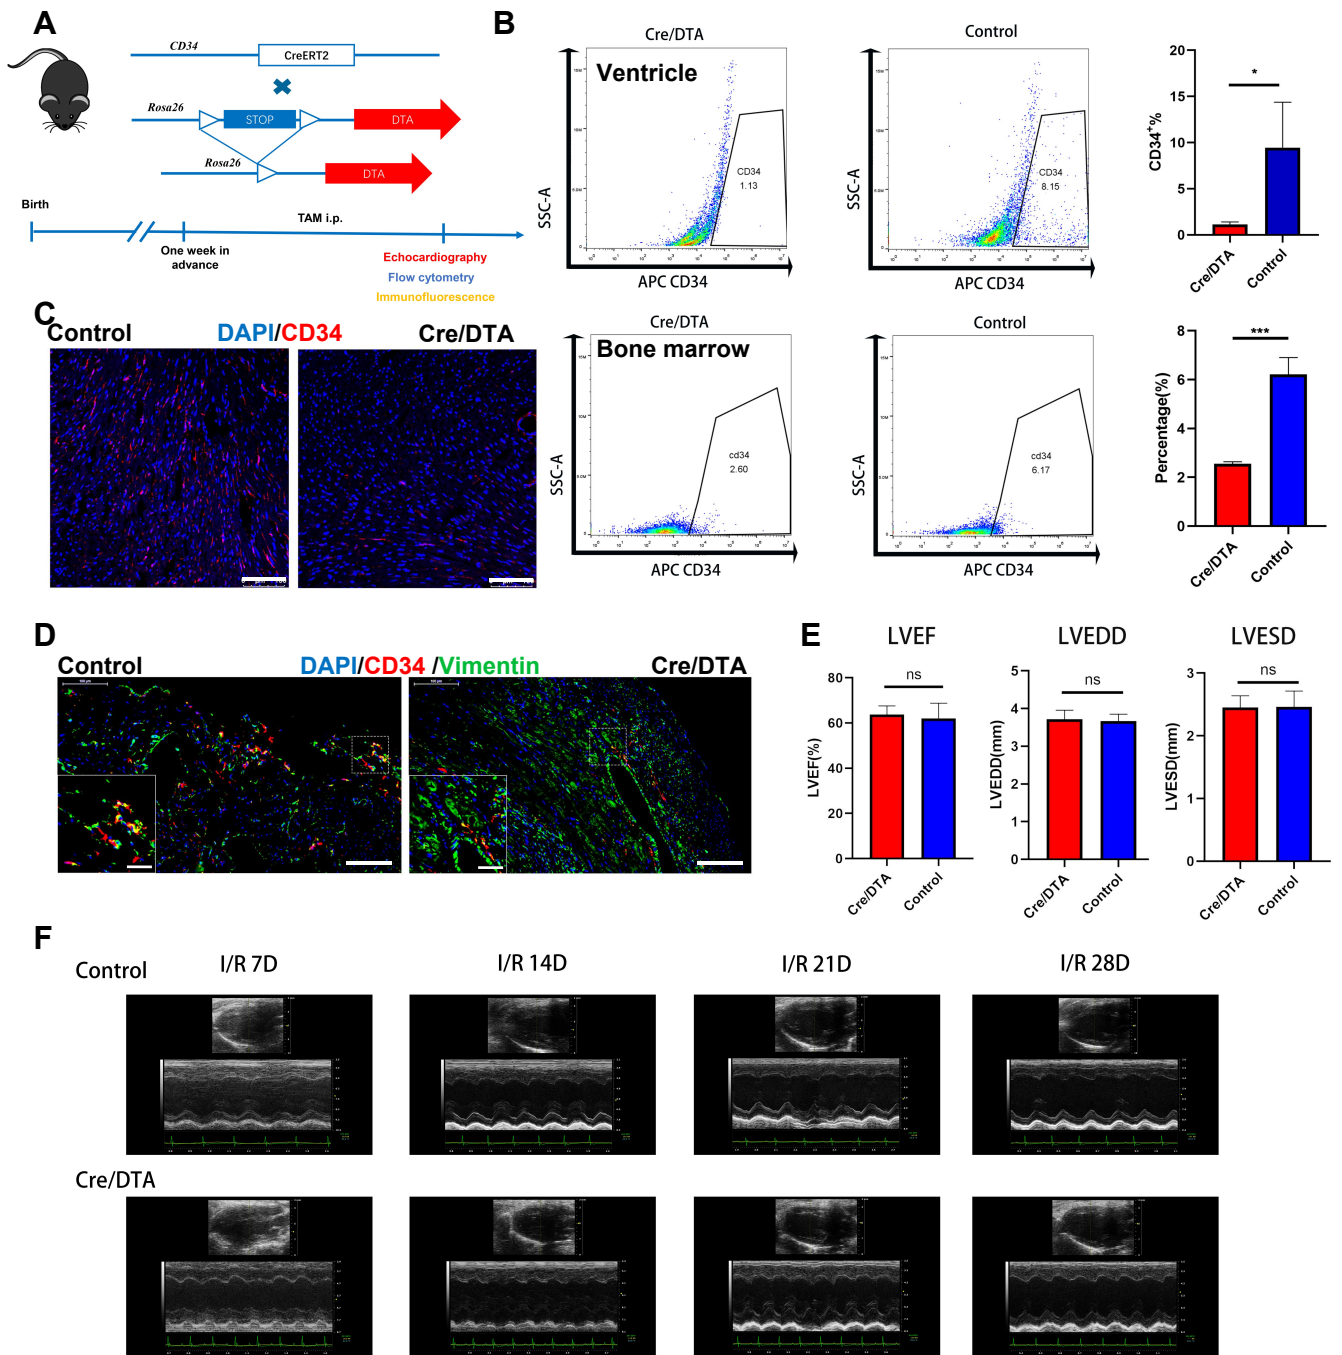

**Figure S10. The effect of CD34<sup>+</sup> cell ablation on I/R injury. (A)** Schematic of the *Cd34-CreERT<sup>2</sup>;R26-DTA* (*Cre/DTA*) mice. Under the administration of tamoxifen the *LoxP* flanked *STOP* cassette was recombined off to induce a diphtheria toxin (DT) induced CD34<sup>+</sup> cell ablation. Experimental scheme whereby *Cre/DTA* mice were given tamoxifen 1 week before heart harvesting. **(B)** Representative flow cytometry analyses of freshly isolated ventricles cells (upper) and bone marrow cells (below) from *Cre/DTA* mice or control mice staining with APC-conjugated CD34 antibody, with quantification of CD34<sup>+</sup> cells among all isolated cells between two genotypes. N=3 mice per group. **(C)** Representative cross-sections of *Cre/DTA* or control ventricles staining CD34. *Cre/DTA* mice with pure oil administration were used as control. **(D)** Representative cross-sections of *Cre/DTA* and control ventricles staining CD34 with vimentin in border zones at 4-week after I/R injury, with magnification of the boxed region. **(E)** Echocardiographic measurements of LVEF, LVEDD and LVESD in *Cre/DTA* or control mice under normal condition. N=7 mice per group. **(F)** Representative echocardiogram of *Cre/DTA* and control mice after I/R injury at different time point. Data was shown as mean  $\pm$  SEM, ns, not significant, \* $p < 0.05$ , \*\*\* $p < 0.001$ , by student's t test. Scale bars, 100 $\mu$ m and 20  $\mu$ m in magnification.

Fig. S11

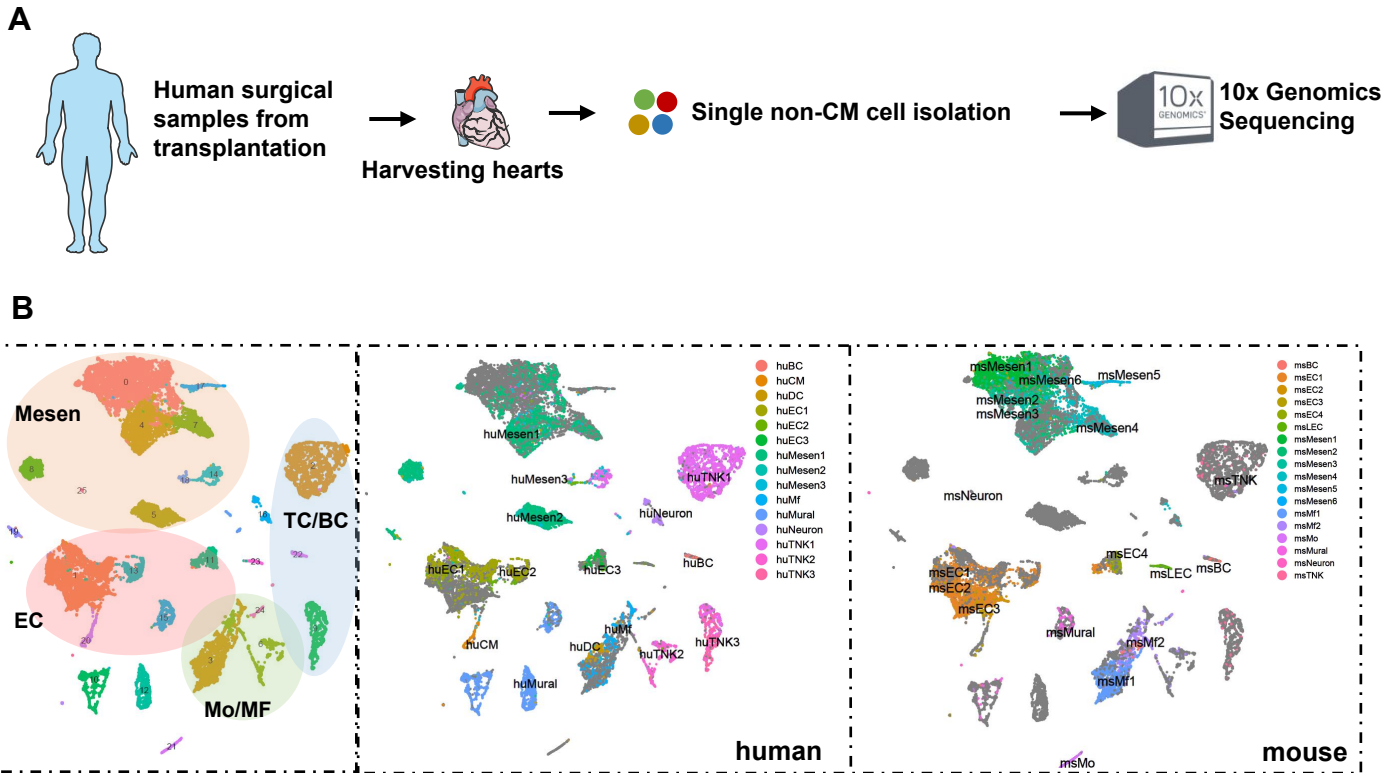

**Figure S11. Validation of CD34<sup>+</sup> cells in human heart.** (A) Schematic depicting heart tissue harvested from human. Left ventricle tissue was obtained from patients undergoing heart transplantation and enzymatically digested for scRNA-seq. (B) UMAP plots exhibiting integrated and separate human and mouse single-cell cardiac non-CM clustering analysed by LIGER, color-coded by cell types. BC, B cell. TC, T cells. Mo, monocyte. MF, macrophage. EC, endothelial cell. Mesen, mesenchymal cell.
